# Supplementary material
Source: HighWire-hosted journal article supplement (https://oem.bmj.com/content/74/3/184)
Supplement: inline-supplementary-material-1 [file inline-supplementary-material-1.pdf]

**Appendix Table 1:** Survey wave in which a participant was diagnosed with a chronic condition and Province resided. Weighted N includes all participants with and without diagnosis in each model.

|                              | Arthritis  |               | Back pain  |               | Diabetes   |               | Hypertension |               | Heart disease |               |
|------------------------------|------------|---------------|------------|---------------|------------|---------------|--------------|---------------|---------------|---------------|
|                              | Weighted N | Diagnosed (%) | Weighted N | Diagnosed (%) | Weighted N | Diagnosed (%) | Weighted N   | Diagnosed (%) | Weighted N    | Diagnosed (%) |
| Survey wave diagnosed        |            |               |            |               |            |               |              |               |               |               |
| 1996                         | 1045       | 15.9          | 1420       | 17.4          | 121        | 18.2          | 570          | 14.8          | 143           | 17.1          |
| 1998                         | 598        | 20.4          | 895        | 19.4          | 126        | 19.7          | 458          | 15.5          | 144           | 23.1          |
| 2000                         | 598        | 17.3          | 684        | 20.3          | 120        | 19.8          | 450          | 15.4          | 131           | 10.1          |
| 2002                         | 590        | 20.5          | 574        | 18.3          | 174        | 12.3          | 435          | 18.6          | 134           | 24.3          |
| 2004                         | 464        | 26.4          | 469        | 17.7          | 164        | 14.3          | 448          | 21.1          | 115           | 19.5          |
| 2006                         | 274        | 25.5          | 364        | 17.9          | 206        | 12.4          | 403          | 19.9          | 109           | 19.9          |
| 2008                         | 305        | 24.0          | 249        | 17.9          | 174        | 21.1          | 356          | 25.0          | 107           | 15.4          |
| Province*                    |            |               |            |               |            |               |              |               |               |               |
| Newfoundland and Labrador    | 57         | 21.9          | 68         | 16.0          | 14         | 21.4          | 49           | 20.2          | 11            | 19.0          |
| Prince Edward Island         | 21         | 20.1          | 23         | 15.7          | 6          | 22.9          | 14           | 28.9          | 4             | 16.5          |
| Nova Scotia                  | 109        | 30.0          | 128        | 17.6          | 29         | 17.1          | 82           | 22.3          | 24            | 25.7          |
| New Brunswick                | 91         | 21.0          | 114        | 14.4          | 25         | 17.7          | 73           | 18.4          | 22            | 25.3          |
| Quebec                       | 925        | 14.4          | 1146       | 17.4          | 265        | 13.1          | 741          | 19.6          | 189           | 19.1          |
| Ontario                      | 1524       | 22.5          | 1772       | 17.5          | 426        | 19.0          | 1203         | 17.2          | 356           | 21.3          |
| Manitoba                     | 149        | 22.9          | 182        | 16.5          | 37         | 18.3          | 118          | 23.0          | 27            | 10.9          |
| Saskatchewan                 | 127        | 24.1          | 156        | 20.8          | 28         | 18.0          | 117          | 23.4          | 25            | 23.0          |
| Alberta                      | 389        | 22.9          | 479        | 21.7          | 118        | 16.3          | 320          | 16.2          | 92            | 15.9          |
| British Columbia/Territories | 481        | 16.4          | 587        | 22.0          | 137        | 12.6          | 403          | 16.1          | 133           | 10.1          |

**Notes:** \* = Measured at Time 0, when respondents were employed and not diagnosed with any health condition; † = Work hours in wave previous to disease diagnosis; ‡ = Working status at current wave.
